# Supplementary material for: Micropatterning of Metal Nanoparticle Ink by Laser-Induced Thermocapillary Flow
Source: MDPI journal article supplement (doi:10.3390/nano8090645), 2018-08-22
Supplement: s1 [file s1]

# Micropatterning of Metal Nanoparticle Ink by Laser-Induced Thermocapillary Flow

Sewoong Park, Jinhyeong Kwon, Jaemook Lim, Wooseop Shin, Younggeun Lee, Habeom Lee, Hyun-Jong Kim, Seungyong Han, Junyeob Yeo, Seung Hwan Ko, and Sukjoon Hong

Supporting Information

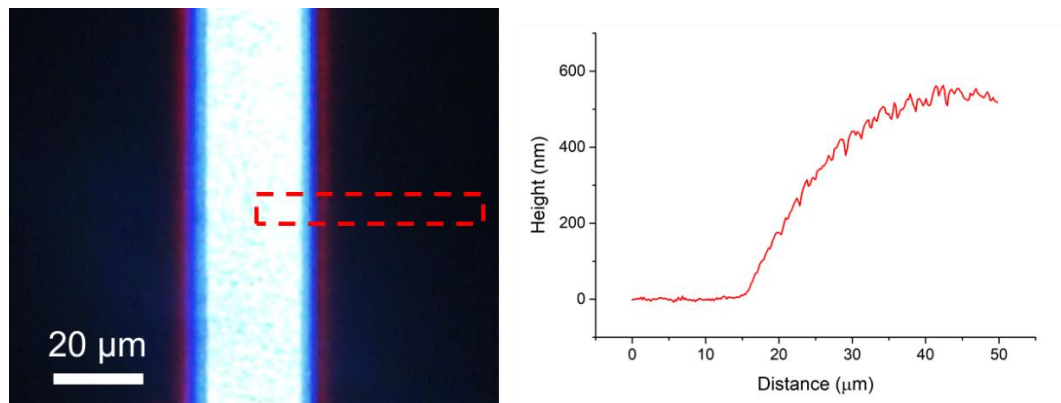

**Figure S1.** Transmission optical microscope image and AFM height profile of sintered Ag NP layer after applying the proposed method to generate a line pattern.

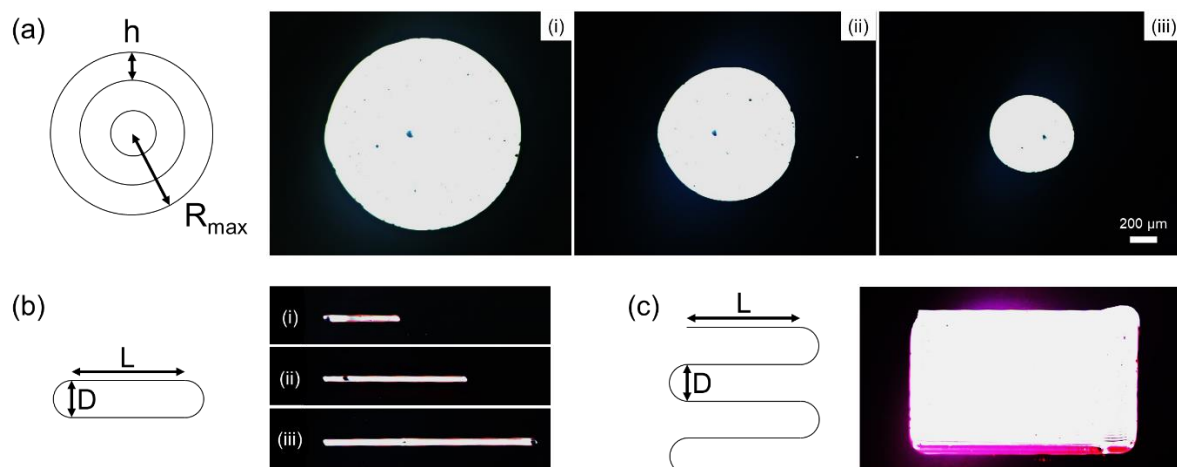

**Figure S2.** Hatching schematics and the transmission optical microscope images of (a) holes at (i)  $R_{\text{max}} = 1.2$  mm (ii)  $R_{\text{max}} = 0.8$  mm (iii)  $R_{\text{max}} = 0.4$  mm with  $h = 10$   $\mu\text{m}$  (b) cylindrical pins at (i)  $L = 0.5$  mm (ii)  $L = 1.0$  mm (iii)  $L = 1.5$  mm with  $D = 10$   $\mu\text{m}$  and (c) rectangular area with  $L = 1.5$  mm with  $D = 10$   $\mu\text{m}$ .

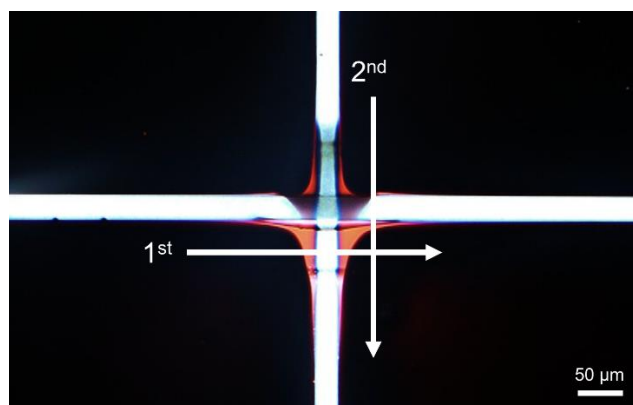

**Figure S3.** Transmission optical microscope image of Ag NP layer after applying the proposed method overlapped in two perpendicular directions.
